# Supplementary material
Source: MDPI journal article supplement (https://www.mdpi.com/2227-9040/9/7/165)
Supplement: s1 [file s1]

## Supporting Information

# BODIPY-Pyridylhydrazone Probe for Fluorescence Turn-on Detection of Fe<sup>3+</sup> and Its Bioimaging Application

|                                                                                                                                              | Page |
|----------------------------------------------------------------------------------------------------------------------------------------------|------|
| <sup>1</sup> H and <sup>13</sup> C Nuclear Magnetic resonance (NMR) spectra.....                                                             | 2    |
| Mass spectra <b>BODIPY-PH</b> compound and its Fe <sup>3+</sup> complex.....                                                                 | 3    |
| Crystal data.....                                                                                                                            | 4    |
| Standard calibration curve of the fluorescent intensities of <b>BODIPY-PH</b> <i>vs.</i> Fe <sup>3+</sup> concentrations.....                | 5    |
| Investigation of the binding and complexation between <b>BODIPY-PH</b> ligand and Fe <sup>3+</sup> ion by X-ray absorption spectroscopy..... | 6    |
| Cell viability and imaging data.....                                                                                                         | 7    |

### 1. <sup>1</sup>H and <sup>13</sup>C Nuclear Magnetic resonance (NMR) spectra

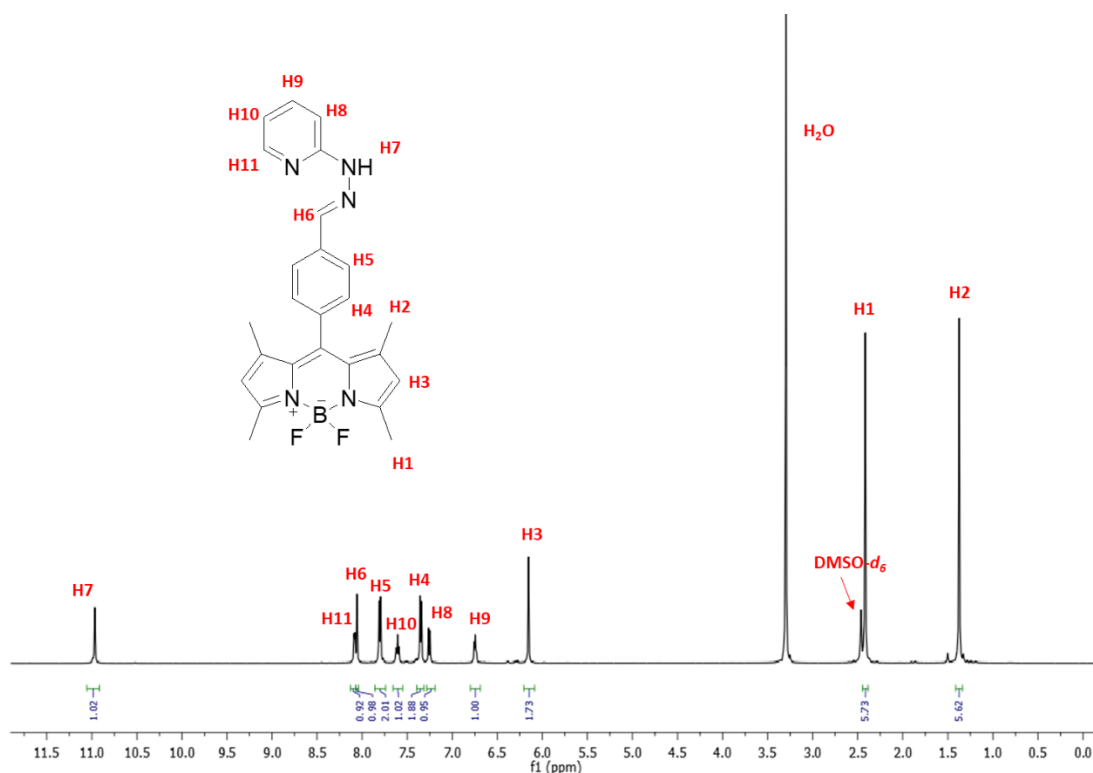

Figure S1. <sup>1</sup>H NMR spectra of **BODIPY-PH**.

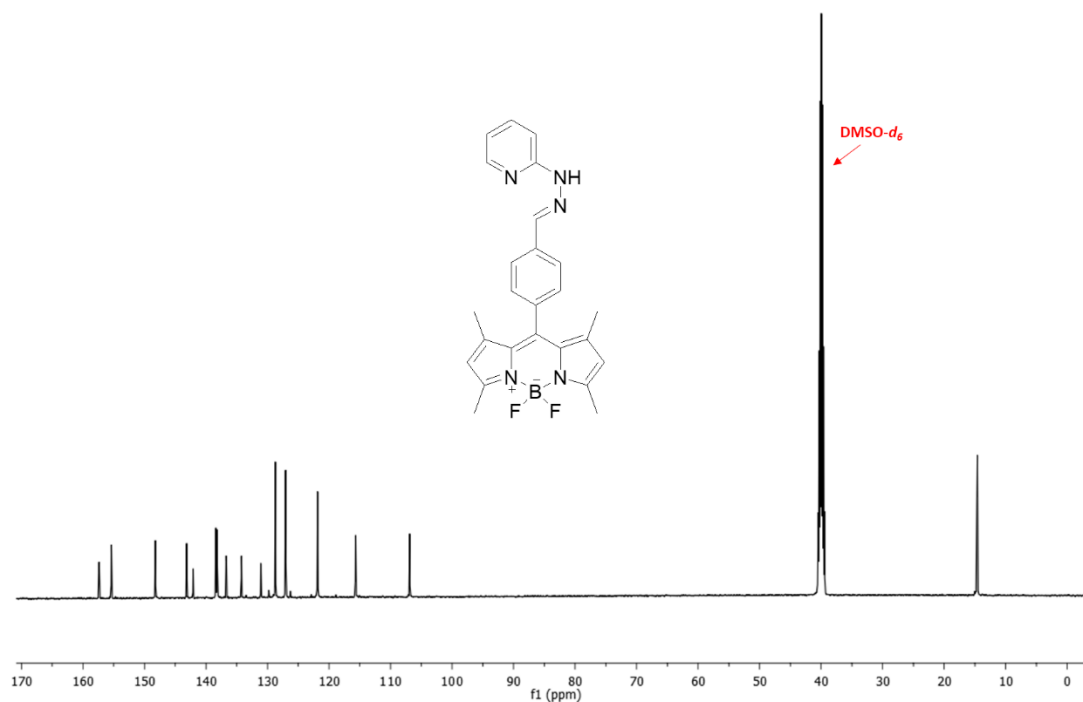

Figure S2. <sup>13</sup>C NMR spectra of BODIPY-PH.

## 2. Mass spectra BODIPY-PH compound and its Fe<sup>3+</sup> complexes

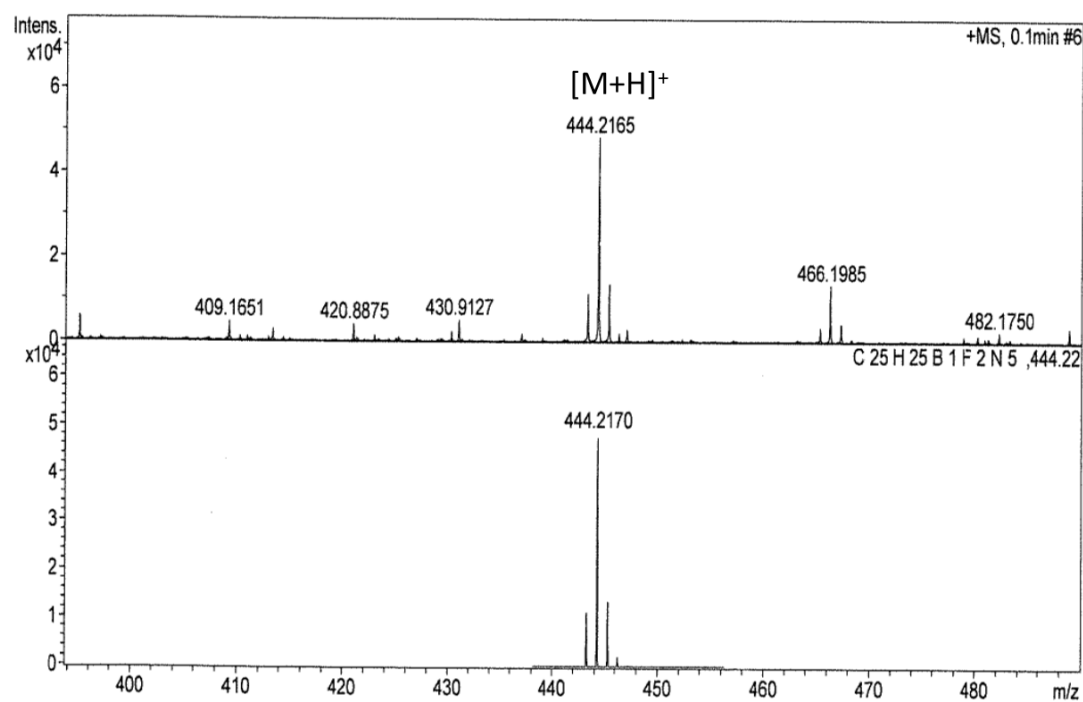

Figure S3. Mass spectra of BODIPY-PH.

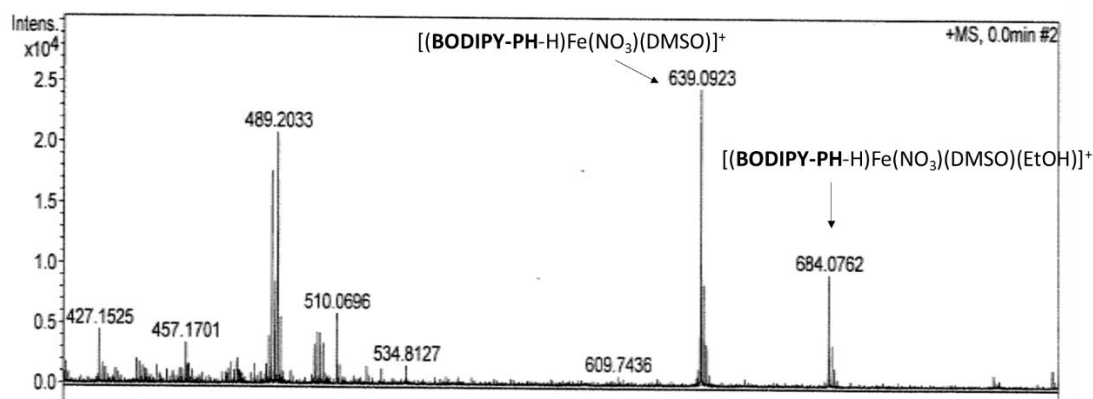

**Figure S4.** Mass spectra of BODIPY-PH-Fe<sup>3+</sup> complexes.

### 3. Crystal data

**Table S1.** Crystal data and structure refinement for BODIPY-PH.

| Compound                                      | BODIPY-PH                                                      |
|-----------------------------------------------|----------------------------------------------------------------|
| Empirical formula                             | C <sub>25</sub> H <sub>24</sub> BF <sub>2</sub> N <sub>5</sub> |
| Formula weight                                | 443.30                                                         |
| Temperature/K                                 | 298.0                                                          |
| Crystal system                                | Triclinic                                                      |
| Space group                                   | $P\bar{1}$                                                     |
| $a/\text{\AA}$                                | 10.9769 (7)                                                    |
| $b/\text{\AA}$                                | 11.0720 (7)                                                    |
| $c/\text{\AA}$                                | 13.0490 (8)                                                    |
| $\alpha/^\circ$                               | 85.470 (2)                                                     |
| $\beta/^\circ$                                | 78.635 (2)                                                     |
| $\gamma/^\circ$                               | 60.491 (2)                                                     |
| Volume/ $\text{\AA}^3$                        | 1352.83 (15)                                                   |
| $Z$                                           | 2                                                              |
| $\rho_{\text{calc}}/\text{g/cm}^3$            | 1.088                                                          |
| $\mu/\text{mm}^{-1}$                          | 0.616                                                          |
| $F(000)$                                      | 464.0                                                          |
| Crystal size/ $\text{mm}^3$                   | $0.4 \times 0.33 \times 0.07$                                  |
| Radiation                                     | CuK $\alpha$ ( $\lambda = 1.54178$ )                           |
| $2\theta$ range for data collection/ $^\circ$ | 9.41 to 136.46                                                 |
| Index ranges                                  | $-13 \leq h \leq 13, -13 \leq k \leq 13, -15 \leq l \leq 14$   |
| Reflections collected                         | 20374                                                          |
| Independent reflections                       | 4790 [ $R_{\text{int}} = 0.0202, R_{\text{sigma}} = 0.0202$ ]  |
| Data/restraints/parameters                    | 4790/0/306                                                     |
| Goodness-of-fit on $F^2$                      | 1.738                                                          |
| Final R indexes [ $I \geq 2\sigma(I)$ ]       | $R_1 = 0.0965, wR_2 = 0.3336$                                  |
| Final R indexes [all data]                    | $R_1 = 0.1025, wR_2 = 0.3518$                                  |
| Largest diff. peak/hole / $e \text{\AA}^{-3}$ | 0.53/-0.53                                                     |

**Table S2.** Geometric parameters and symmetry operations for intermolecular H-bond interactions ( $\text{\AA}, ^\circ$ ).

| D—H $\cdots$ A                     | $d(\text{D—H})/\text{\AA}$ | $d(\text{H}\cdots\text{A})/\text{\AA}$ | $d(\text{D}\cdots\text{A})/\text{\AA}$ | D—H $\cdots$ A/ $^\circ$ |
|------------------------------------|----------------------------|----------------------------------------|----------------------------------------|--------------------------|
| N4—H4 $\cdots$ N5 <sup>i</sup>     | 0.81(4)                    | 2.00(2)                                | 2.891(2)                               | 177(2)                   |
| C15—H15 $\cdots$ F1 <sup>ii</sup>  | 0.93                       | 2.45                                   | 3.280(2)                               | 148                      |
| C25—H25 $\cdots$ F2 <sup>iii</sup> | 0.93                       | 2.47                                   | 3.225(4)                               | 139                      |

Symmetry codes: (i)  $-x, 2-y, -z$ ; (ii)  $1-x, -y, 1-z$ ; (iii)  $-1+x, 1+y, -1+z$ .

### 4. Standard calibration curve of BODIPY-PH vs. Fe<sup>3+</sup> concentrations

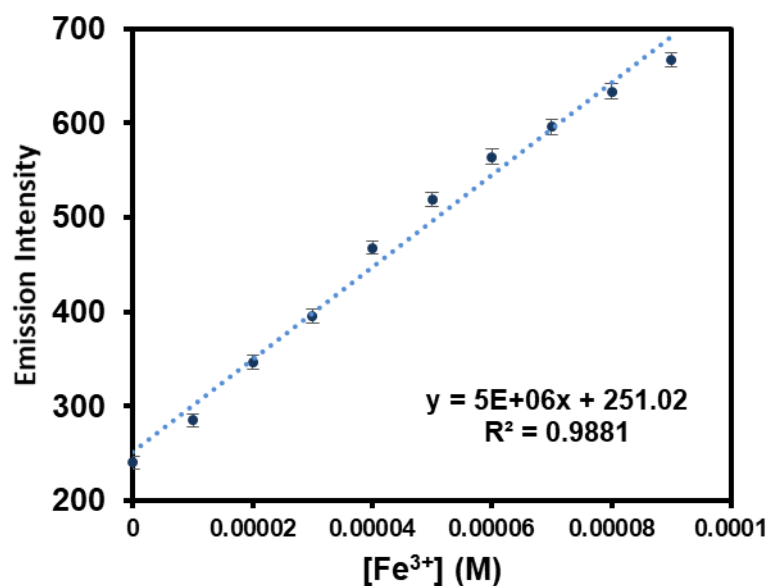

**Figure S5.** Standard calibration curve demonstrating the fluorescence intensity increments at 518 nm ( $n = 3$ ) as a function of  $\text{Fe}^{3+}$  concentrations incubated with **BODIPY-PH** (10  $\mu\text{M}$ ) in acetonitrile-water (1:9 v/v).

## 5. Investigation of the binding and complexation between BODIPY-PH ligand and $\text{Fe}^{3+}$ ion by X-ray absorption spectroscopy

**Table S3.** EXAFS fitting data for investigating the structural information of the complexation between BODIPY-PH ligand and  $\text{Fe}^{3+}$  ion.

| EXAFS fitting parameters                  |   | Fitting value                 |                            |
|-------------------------------------------|---|-------------------------------|----------------------------|
| <b>R-factor</b>                           |   | <b>0.00482</b>                |                            |
| Reduced chi-square                        |   | 51.2883                       |                            |
| $\Delta E_0$ (eV)                         |   | 1.4547                        |                            |
| $S_0^2$                                   |   | 0.9582                        |                            |
| Scattering path (local structure)         | N | $\sigma^2$ ( $\text{\AA}^2$ ) | refined R ( $\text{\AA}$ ) |
| <b>First shell</b>                        |   |                               |                            |
| Fe—O ( $\text{H}_2\text{O}$ )             | 4 | 0.00192                       | 2.01300                    |
| Fe—N5 (BODIPY-PH)                         | 1 | 0.00110                       | 1.99489                    |
| Fe—N3 (BODIPY-PH)                         | 1 | 0.00110                       | 2.26568                    |
| <b>Second shell / Multiple scattering</b> |   |                               |                            |
| Fe—C21 (BODIPY-PH)                        | 1 | 0.01106                       | 2.86696                    |
| Fe—C25 (BODIPY-PH)                        | 1 | 0.01106                       | 2.92637                    |
| Fe—N4 (BODIPY-PH)                         | 1 | 0.00110                       | 2.96870                    |
| Fe—C20 (BODIPY-PH)                        | 1 | 0.01106                       | 3.22192                    |
| Fe—N3—C20 (BODIPY-PH)                     | 2 | 0.00664                       | 3.37143                    |
| <b>Third shell / Multiple scattering</b>  |   |                               |                            |
| Fe—C22 or Fe—C24 (BODIPY-PH)              | 2 | 0.01106                       | 4.19386                    |
| Fe—C21—C22 (BODIPY-PH)                    | 4 | 0.01659                       | 4.22603                    |

|                       |   |         |         |
|-----------------------|---|---------|---------|
| Fe—N5—C25 (BODIPY-PH) | 4 | 0.00664 | 4.26876 |
|-----------------------|---|---------|---------|

## 5. Cell viability and imaging data

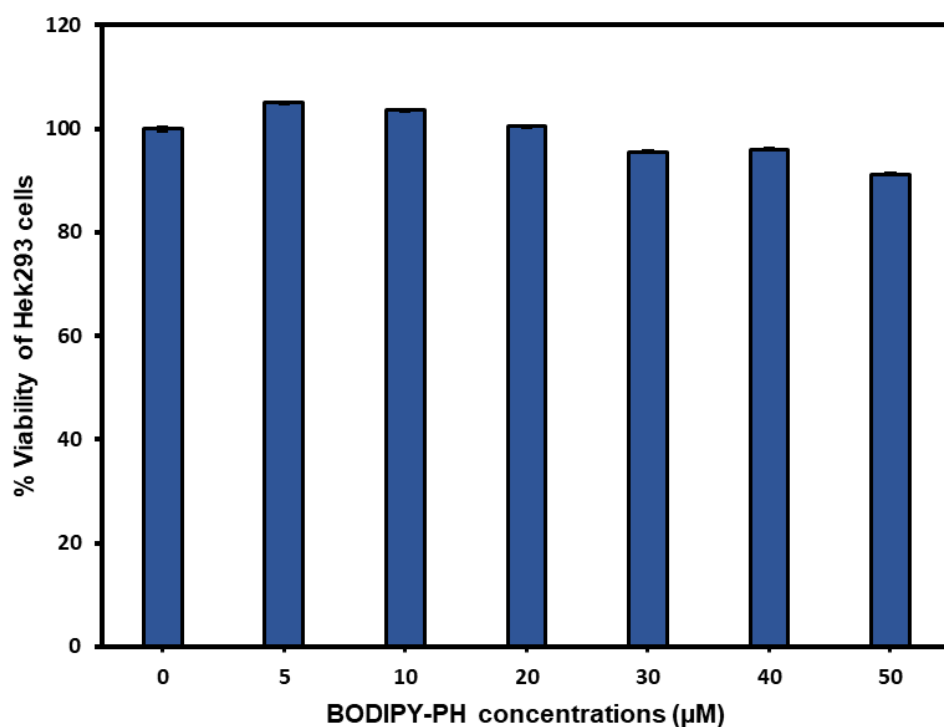

**Figure S6.** Percent cell viability estimated by MTT proliferation test versus incubation concentrations of **BODIPY-PH**. HEK-293 cells were cultured in the presence of **BODIPY-PH** (0-50 μM) at 37 °C for 24 h.

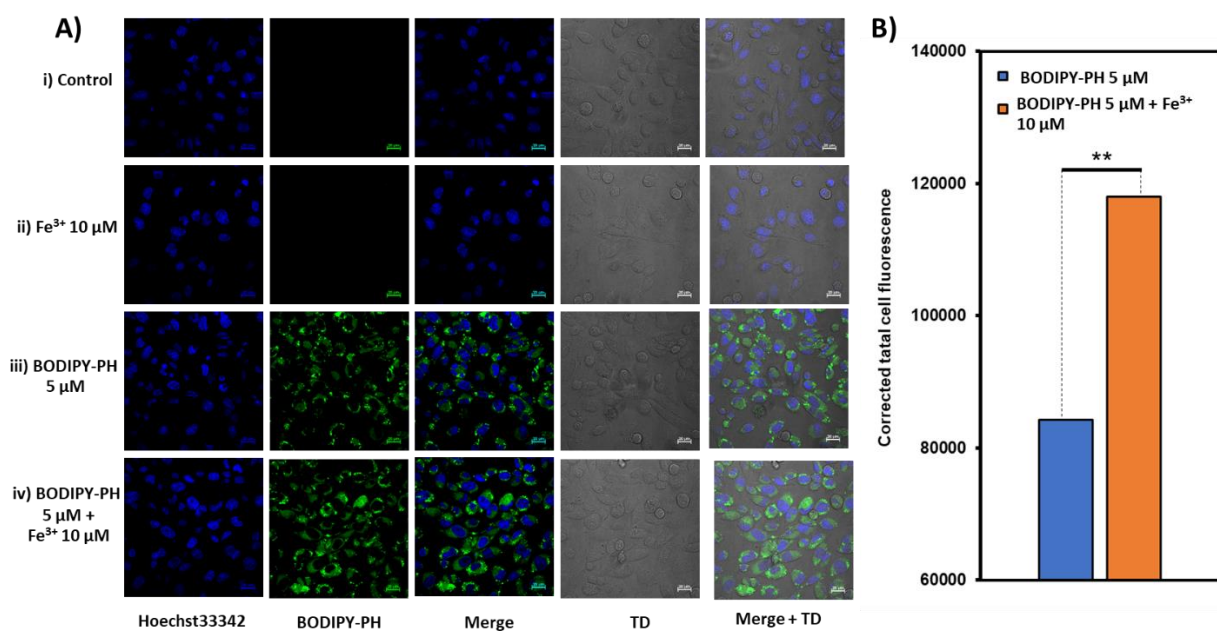

**Figure S7.** A) Confocal laser scanning microscopy (CLSM) images of HEK-293 cells. Row i, control HEK-293 cells with no treatment. Row ii, HEK-293 cells incubated with Fe<sup>3+</sup> (10 μM) for 30 min. Row iii, HEK-293 cells incubated with **BODIPY-PH** (5 μM) for 30 min. Row iv, HEK-293 cells incubated with Fe<sup>3+</sup> (10 μM) for 30 min and subsequently incubated with **BODIPY-PH** (5 μM) for another 30 min (For **BODIPY-PH**:  $\lambda_{ex}$  = 488 nm,  $\lambda_{em}$  = 509 nm, scale bar = 20 μm, TD = transmitted

light differential interference contrast image). All images were collected at the same microscopy settings. B) Bar chart showing corrected total cell fluorescence (CTCF) of HEK-293 cells incubated with **BODIPY-PH** (5  $\mu$ M) before and after the addition of  $\text{Fe}^{3+}$  (10  $\mu$ M). Statistical analysis is based on student's two tailed t-test (\* $P < 0.05$ , \*\* $P < 0.01$ , \*\*\* $P < 0.001$ ).

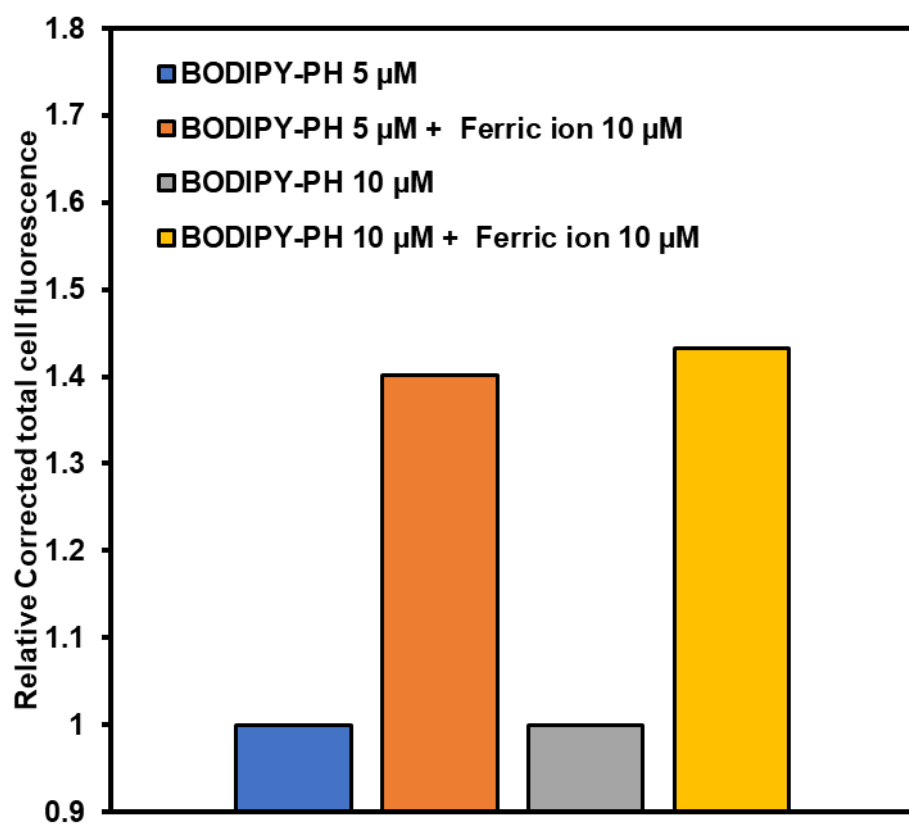

**Figure S8.** Bar chart showing the relative corrected total cell fluorescence (CTCF) of HEK-293 cells incubated with **BODIPY-PH** (5 and 10  $\mu$ M) comparing between before and after the addition of  $\text{Fe}^{3+}$  (10 and 20  $\mu$ M).
